# Supplementary material for: Enhanced Catalysis through Structurally Modified Hybrid 2-D Boron Nitride Nanosheets Comprising of Complexed 2-hydroxy-4- methoxybenzophenone Motif
Source: Research Square preprint supplement (doi:10.21203/rs.3.rs-397151/v1), 2021-04-09
Supplement: Supplementary file 1 [file 6634a0bb22dde8402a296455.docx]

**Enhanced catalysis through structurally modified hybrid 2-D boron nitride nanosheets comprising of complexed 2-hydroxy-4-methoxybenzophenone motif**

Pooja Rana1, Ranjana Dixit1, Shivani Sharma1, Sriparna Dutta1,Sneha Yadav1, Aditi Sharma1, Bhawna Kaushik1, Pooja Rana1,Alok Adholeya2*and Rakesh K. Sharma1*

1 Green Chemistry Network Centre, Department of Chemistry, University of Delhi, NewDelhi-110007, India. Fax: +91-011-27666250; Tel: 011-276666250 Email: [rksharmagreenchem@hotmail.com](mailto:rksharmagreenchem@hotmail.com)

2TERI-Deakin Nanobiotechnology Centre, TERI Gram, The Energy and Resources Institute, Gurugram 122102, India

**Table of Contents**

| **S. No.** | **Content** | **Page No.** |
| --- | --- | --- |
| 1. | **Results and Discussion** | **S3** |
|  | FT-IR analysis | **S3** |
|  | XPS analysis | **S4** |
|  | EDS, ED-XRF | **S5** |
| 2. | **Tables** | **S6** |
|  | **Table S1** Screening of various catalysts for the synthesis of tetrazoles | **S6** |
|  | **Table S2** Comparison of the catalytic activity of *h*-BN@APTES@BP@Cu with previously reported protocols | **S7** |
| 3. | **Recyclability tests** | **S8** |
| 4. | **GC-MS spectra** | **S9-S22** |

**Results and Discussion**

**FT-IR analysis**

**Figure S1.** FT-IR spectra of (a) *h*-BN, (b) *h*-BN@OH, (c) *h*-BN@APTES, (d) *h*- BN@APTES@BP and (e) *h*-BN@APTES@BP@Cu.

**XPS analysis**

**
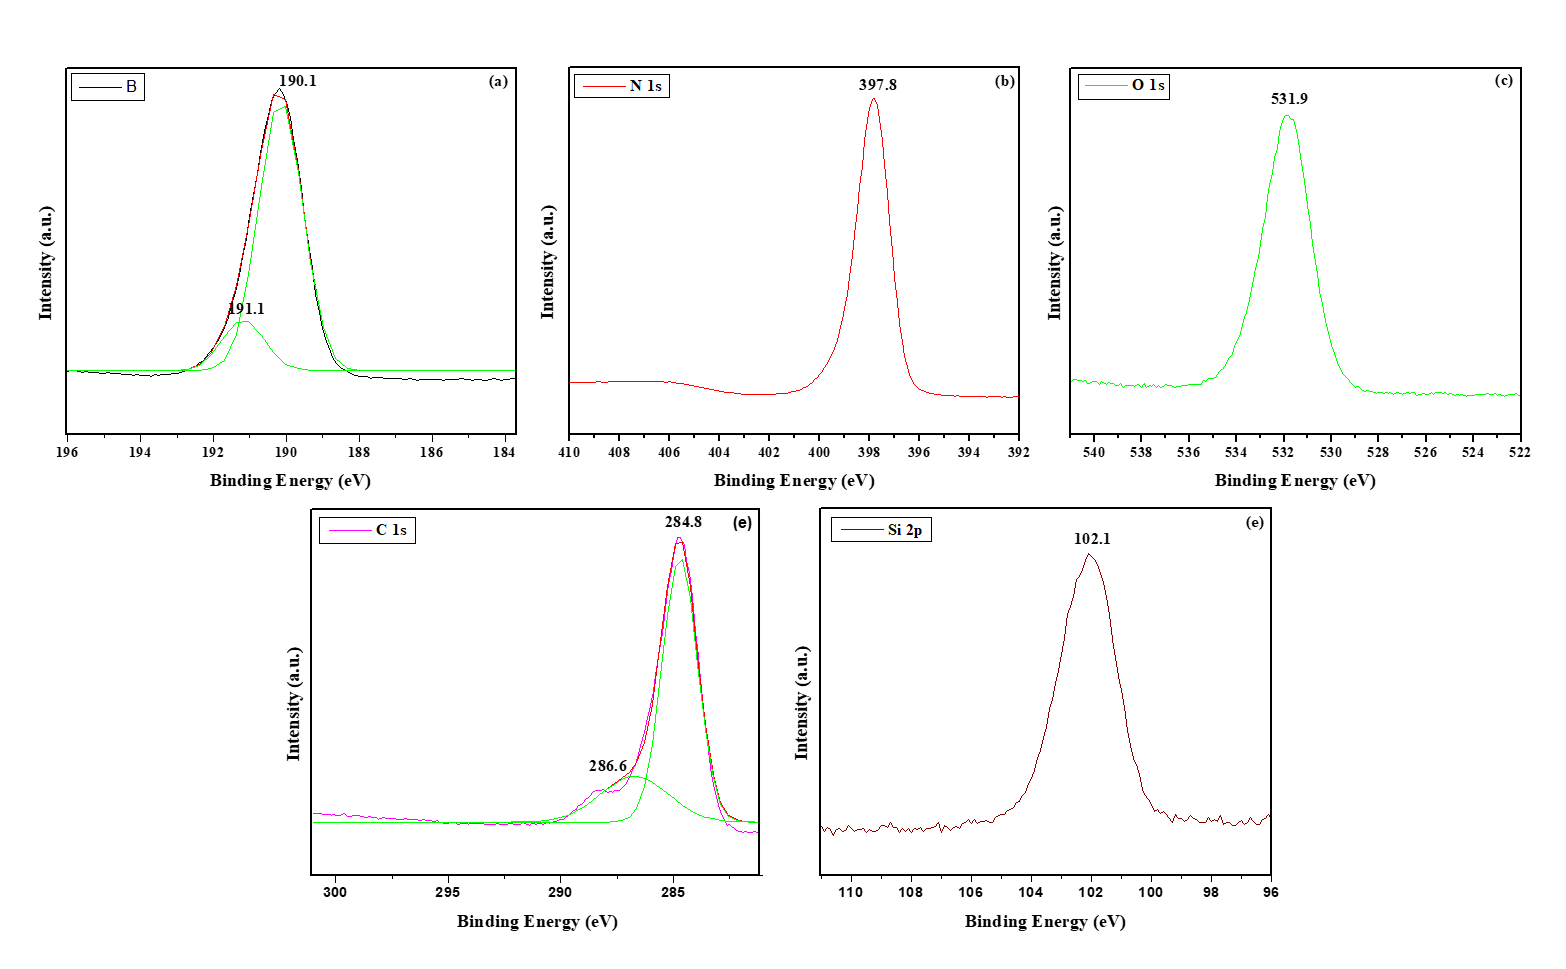
**

**Figure S2.** Core level region XPS spectra of (a) B 1s, (b) N 1s, (c) O 1s, (d) C 1s and (e) Si 2p.

**EDS**

**
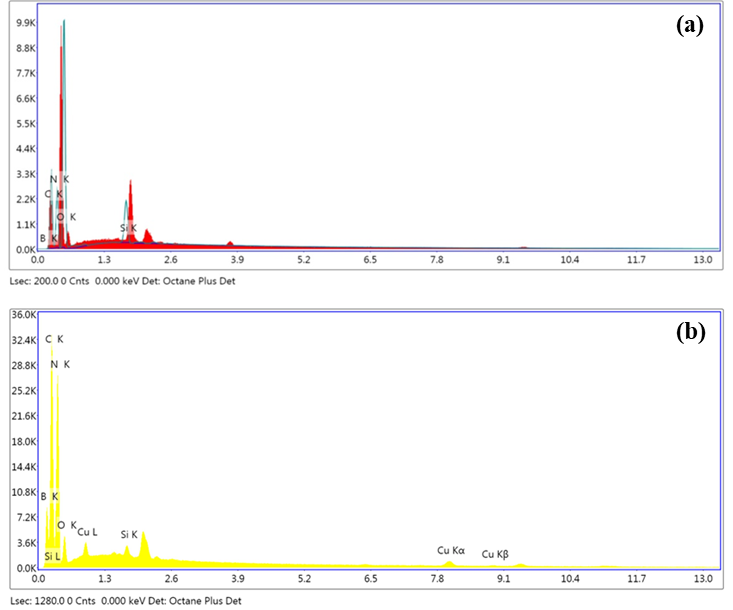
**

**Figure S3.** TheEDS spectra of (a) *h*-BN@APTES and (b) *h*-BN@APTES@BP@Cu.

**ED-XRF**


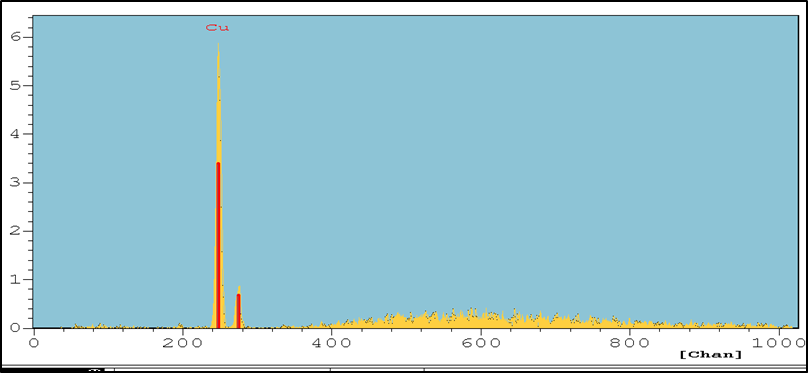


**Figure S4.** ED-XRF spectrum of *h*-BN@APTES@BP@Cu.

**Table S1.** Screening of various catalysts for the synthesis of 5-phenyl 1*H*-tetrazoles *via* [3+2] cycloaddition of benzonitrile and sodium azidea.

**
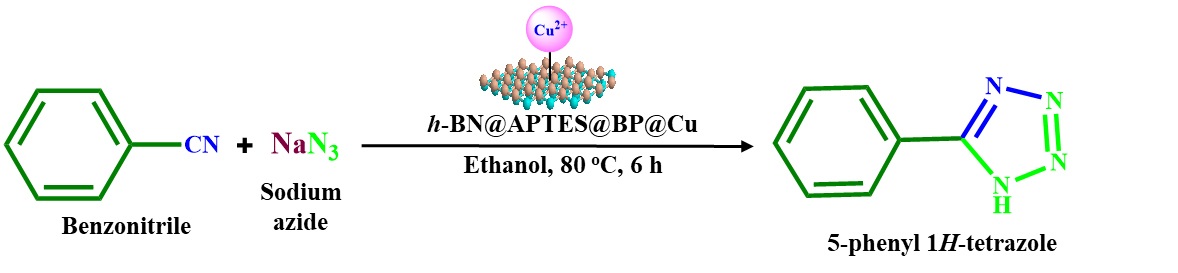
**

| **Entry** | **Catalyst** | **Conversion % b** |
| --- | --- | --- |
| 1. | No catalyst | Trace amount |
| 2. | Cobalt chloride | 93 |
| 3. | Nickel chloride | 86 |
| 4. | *h*-BN@OH | Trace amount |
| 5. | *h*-BN@APTES | Trace amount |
| 6. | *h*-BN@APTES@BP | Trace amount |
| 7. | *h*-BN@APTES@BP@Cu | 100 |

**aReaction conditions:** benzonitrile (1 mmol), sodium azide (2 mmol), catalyst (20 mg), ethanol (1 mL), 6 h, 80 oC. bConversion percentage were determined *via* GC-MS.

**Table S2.** Comparison of the catalytic activity of *h*-BN@APTES@BP@Cu nanocatalyst with other previously reported catalysts for [3+2] cycloaddition of benzonitrile and sodium azide.

| **Entry** | **Aryl nitrile** | **Sodium azide** | **Catalytic conditions** | **Yield (%)** | **Reference** |
| --- | --- | --- | --- | --- | --- |
| 1. |  | NaN3 | CoY, DMF, 120 oC, 14 h | 90 | 39 |
| 2. |  | NaN3 | 3D Porous ZnO, DMF, 125 °C, 14 h | 87 | 40 |
| 3. |  | NaN3 | ZnO/Co3O4, DMF, 120 oC, 12 h | 90 | 41 |
| 4. |  | NaN3 | β-CD, NH4Cl, DMF, 120 °C, 0.75 h | 89 | 42 |
| 5. |  | NaN3 | Pt NPs@GO, DMF, 75 °C, 2 h | 96 | 43 |
| 6. |  | NaN3 | *h*-BN@APTES@BP@Cu, ethanol,  80 oC, 6 h | 99 (100)a | Present study |
|  |  |  |  |  |  |

aConversion percentage was determined *via* GC-MS.

**Recyclability tests**

**

**

**Figure S5.** SEM image of recovered *h*-BN@APTES@BP@Cu catalyst.

**Figure S6.** XRD spectrum of recovered *h*-BN@APTES@BP@Cu catalyst.

**GC-MS spectra**

**Figure S7.** GC spectrum of 5-Phenyl-1*H*-tetrazole, Table 1, Entry 1.

**
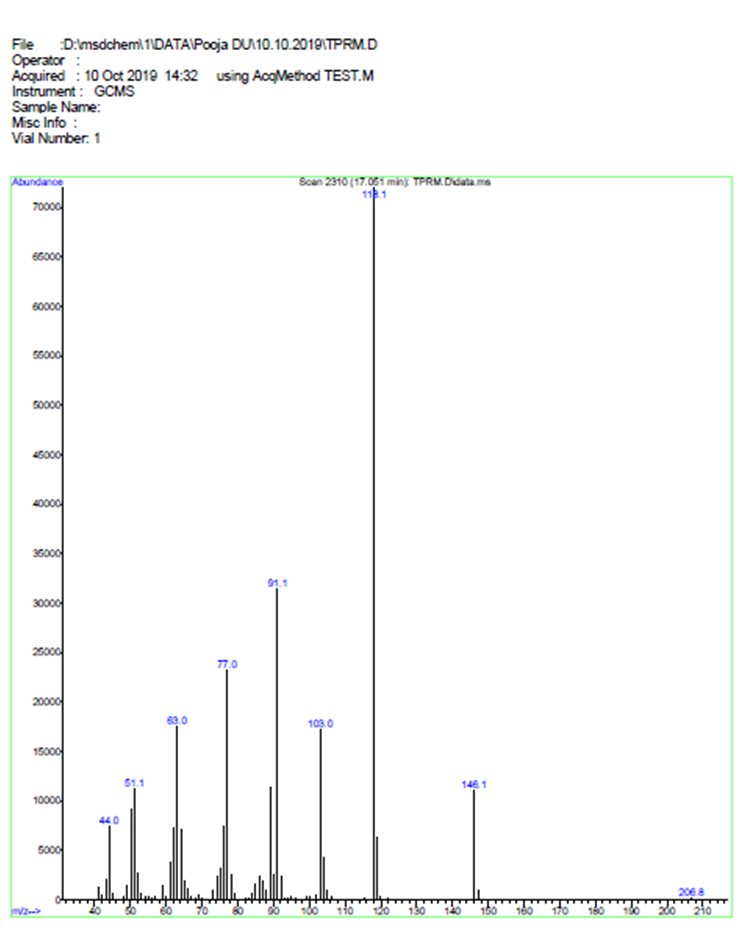
**

**Figure S8.** MS spectrum of 5-Phenyl-1*H*-tetrazole, Table 1, Entry 1.

**Figure S9.** GC spectrum of 5-(4-Cyanophenyl)-1*H*-tetrazole, Table 1, Entry 2.

**
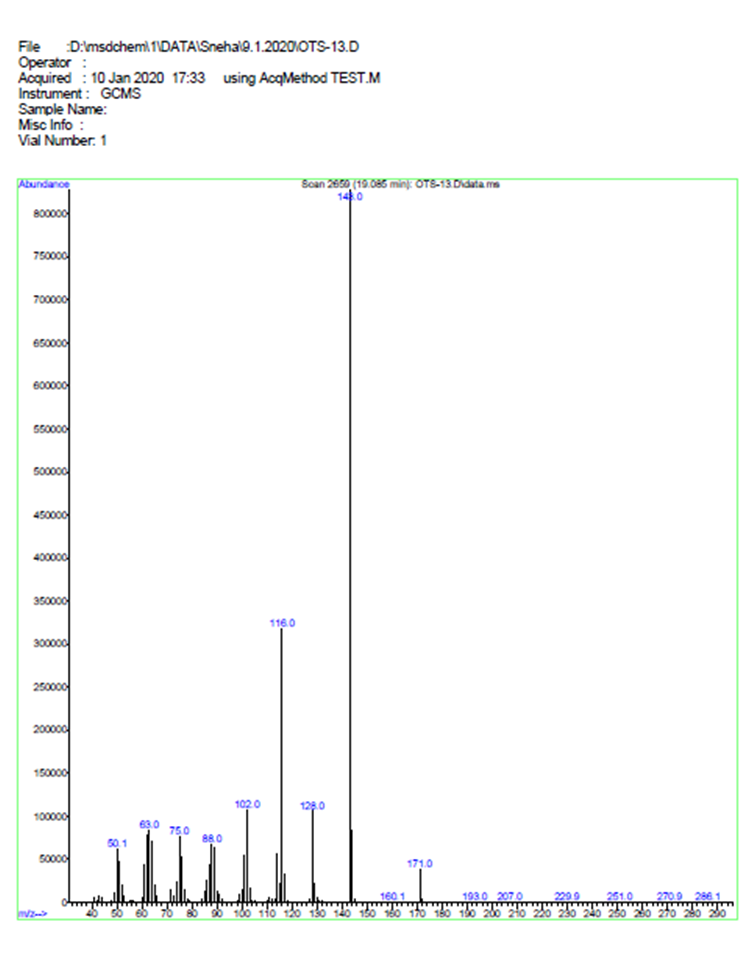
Figure S10.** MS spectrum of 5-(4-Cyanophenyl)-1*H*-tetrazole, Table 1, Entry 2.

**Figure S11.** GC spectrum of 5-(4-Nitrophenyl)-1*H*-tetrazole, Table 1, Entry 3.

**
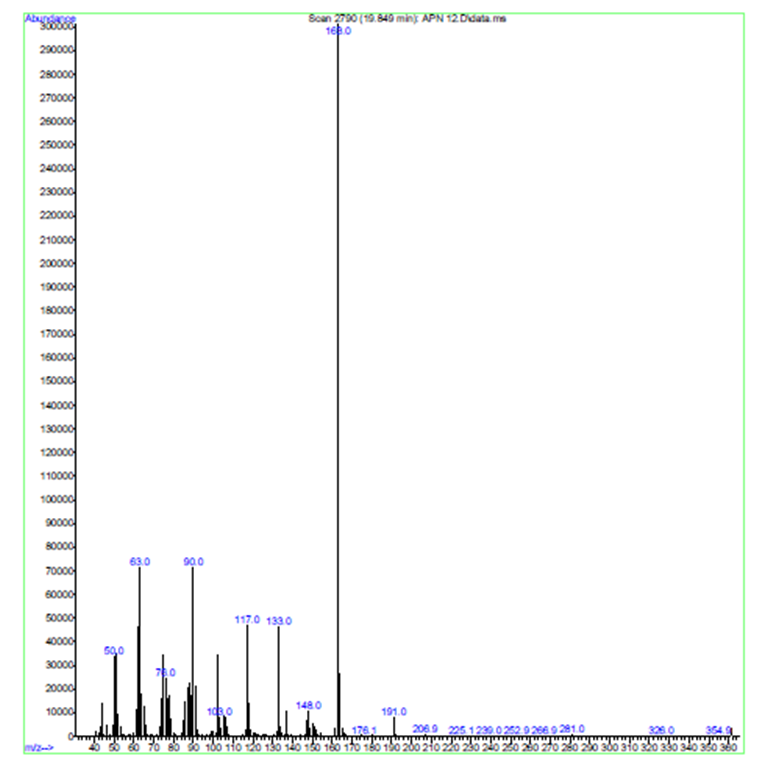
**

**Figure S12.** MS spectrum of 5-(4-Nitrophenyl)-1*H*-tetrazole, Table 1, Entry 3.

**Figure S13.** GC spectrum of 5-(2-Chlorophenyl)-1*H*-tetrazole, Table 1, Entry 4.

**
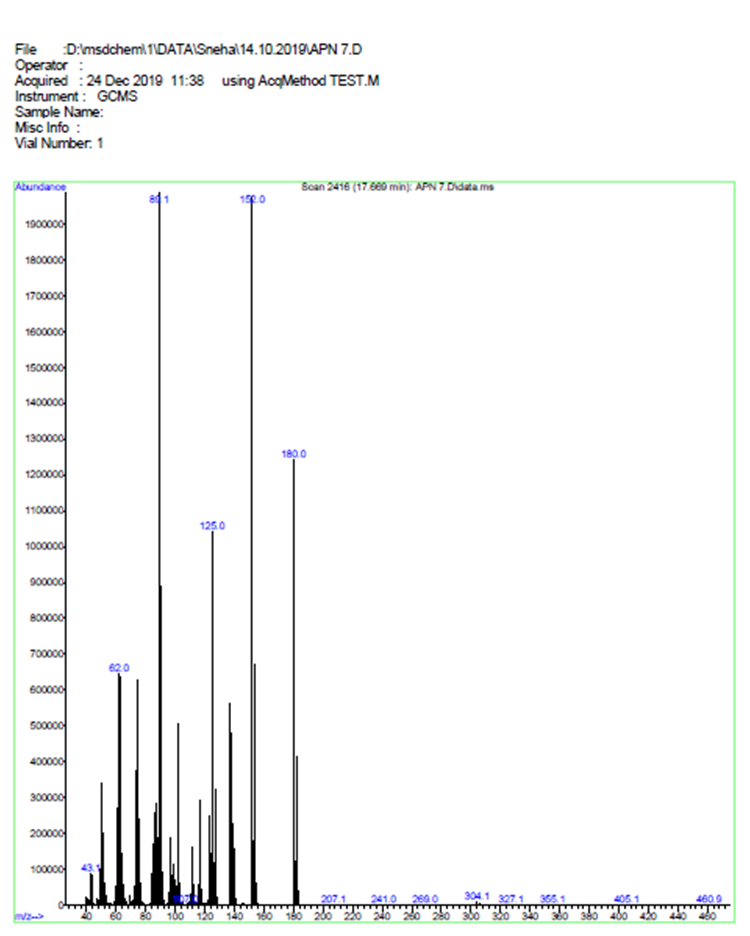
**

**Figure S14.** MS spectrum of 5-(2-Chlorophenyl)-1*H*-tetrazole, Table 1, Entry 4.

**Figure S15.** GC spectrum of 5-(4-Methylphenyl)-1*H*-tetrazole, Table 1, Entry 5.

**
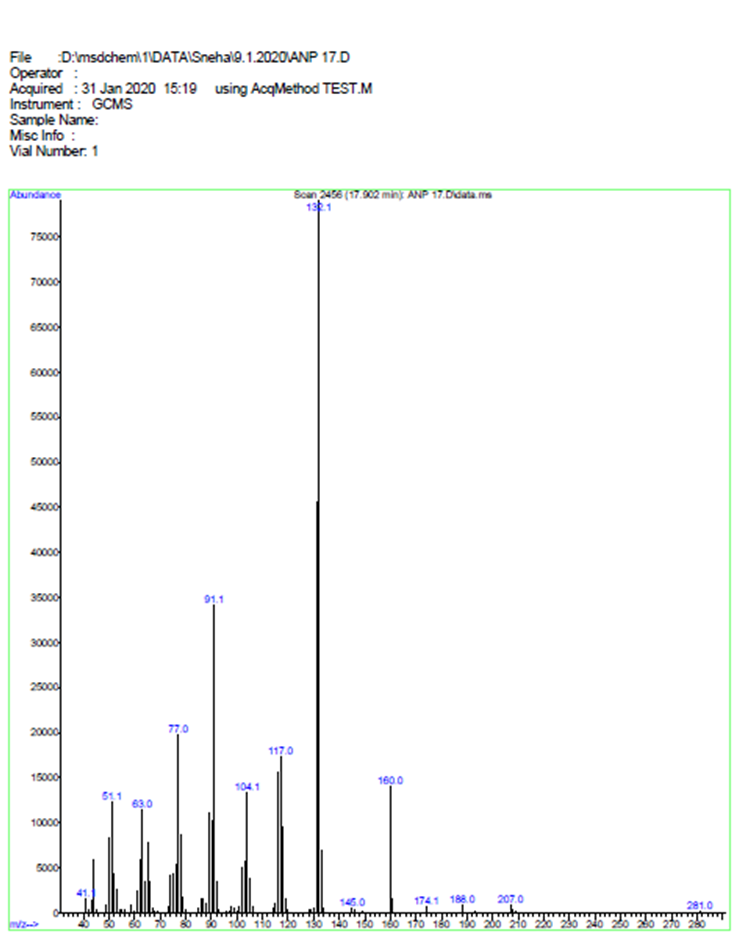
**

**Figure S16.** MS spectrum of 5-(4-Methylphenyl)-1*H*-tetrazole, Table 1, Entry 5.

**Figure S17.** GC spectrum of 5-(4-Methoxyphenyl)-1*H*-tetrazole, Table 1, Entry 6.

**
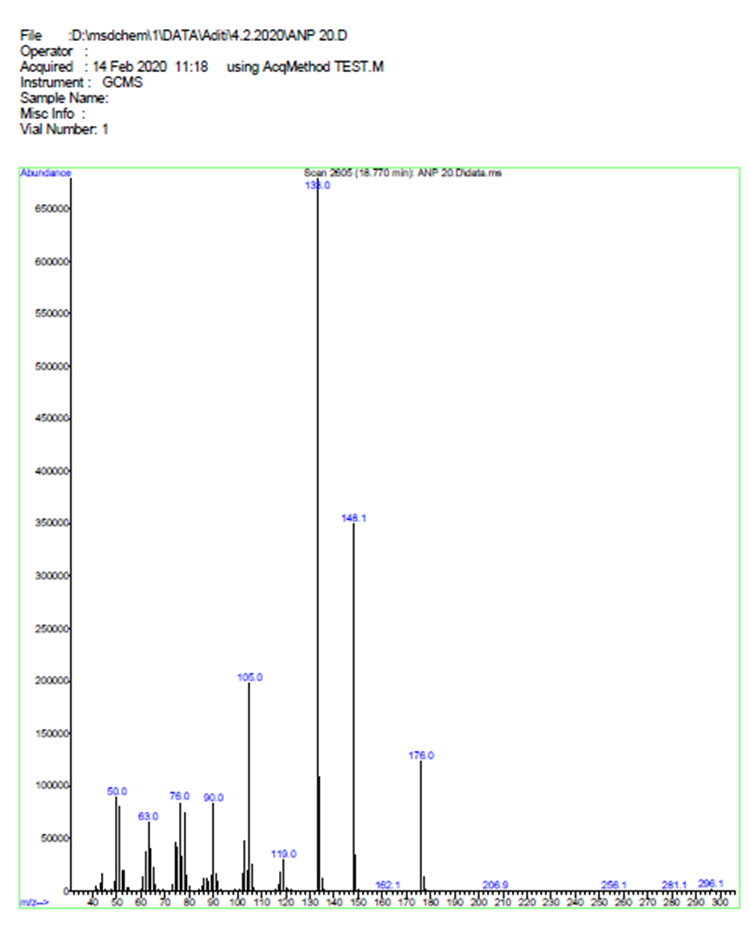
**

**Figure S18.** MS spectrum of 5-(4-Methoxyphenyl)-1*H*-tetrazole, Table 1, Entry 6.

**Figure S19.** GC spectrum of 5-(3-Chlorophenyl)-1*H*-tetrazole, Table 1, Entry 7.

**
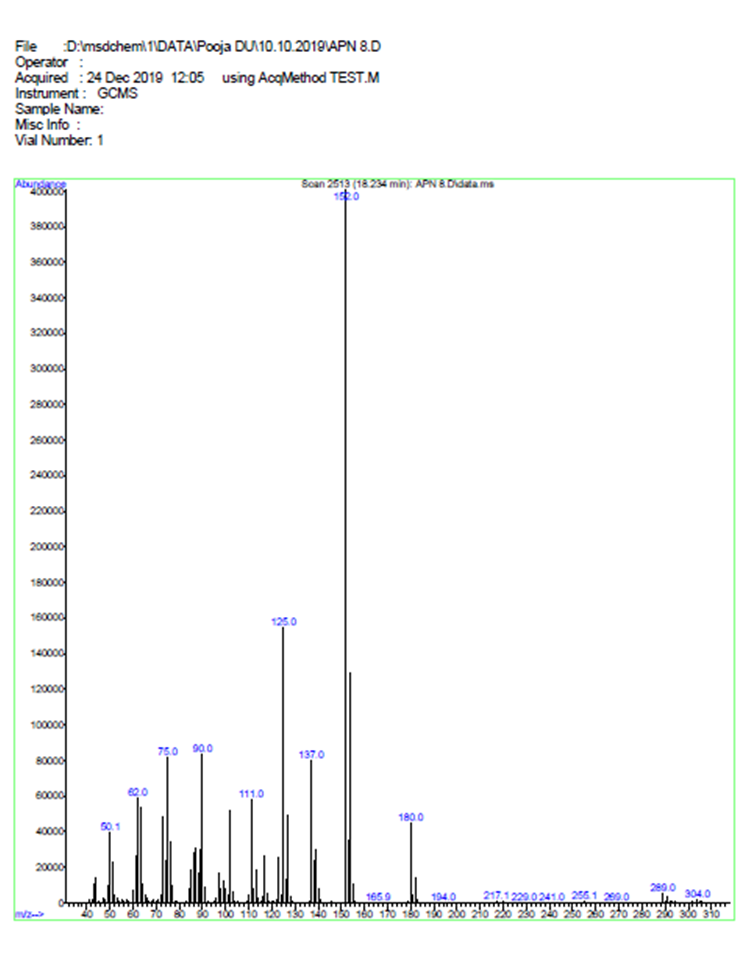
**

**Figure S20.** MS spectrum of 5-(3-Chlorophenyl)-1*H*-tetrazole, Table 1, Entry 7.
